# Supplementary material for: How Sound Symbolism Is Processed in the Brain: A Study on Japanese Mimetic Words
Source: PLoS One. 2014 May 19;9(5):e97905. doi: 10.1371/journal.pone.0097905 (PMC4026540; doi:10.1371/journal.pone.0097905)
Supplement: Table S1 — Cortical activation for figure and motion (Experiment 2). (XLSX) [file pone.0097905.s001.xlsx]

## Sheet: S1
Region of activation	Lat.	Coordinates			T-score	k
		x	y	z
(Figure matched pairs)
STS/MTG	R	62	-38	-2	7.8	206
STG	L	-38	18	-30	6.4	106
MFG	L	-36	54	6	9.44	3769
	R	46	16	20	6.59	113
inferior parietal lobule	R	30	-40	54	7.7	217
	R	56	-52	52	6.74	57
cuneus	L	-2	-100	24	7.51	346
	R	14	-100	0	6.22	7
cingulate gyrus	L	-2	-22	30	6.52	31
precentral gyrus	R	56	2	38	6.15	42
lingual gyrus	L	0	-84	-10	6.09	122
(Figure mismatched pairs)
MFG/SFG	L	-20	4	48	9.22	536
	L	-18	-8	64	8.77	108
superior parietal lobule	L	-42	-60	50	8.33	41
inferior parietal lobule	R	30	-38	54	7.03	8
cuneus	L	-2	-100	24	7.19	11
precentral gyrus	R	58	-16	40	7.43	13
	L	-20	-24	64	7	4
(Motion matched pairs)
STS/MTG	R	64	-40	-2	8.88	141
SFG	R	22	58	22	7.16	11
	L	-20	16	52	12.1	1730
MFG	R	40	48	18	7.57	19
	L	-44	56	-6	7.44	21
IFG	R	54	12	22	7.7	40
	L	-60	6	20	8.92	191
inferior parietal lobule	R	30	-40	54	8.07	233
fusiform gyrus	L	-40	-2	-20	11.43	1110
precentral gyrus	L	-52	-6	10	8.85	36
	L	-20	-24	64	8.54	34
(Motion mismatched pairs)
STG	L	-64	12	-4	8.34	165
SFG	L	-18	-6	66	8.36	88
cingulate gyrus	L	-10	18	36	9.98	685
	R	0	30	22	7.32	13
Note: coordinates (mm) are in MNI space. L = left hemisphere; R = right hemisphere. P < 0.001 (FWE corrected). Abbreviations: STS = superior temporal sulcus; MTG = middle temporal gyrus; STG = superior temporal gyrus; SFG = superiot frontal gyrus; MFG = middle frontal gyrus; IFG = inferior frontal gyrus.
